# Supplementary material
Source: PubMed Central journal article supplement (PMC3271316)

Type of file: figure

Label: Figure E1ABC

Filename: figureE1\_A\_C FINAL.pdf

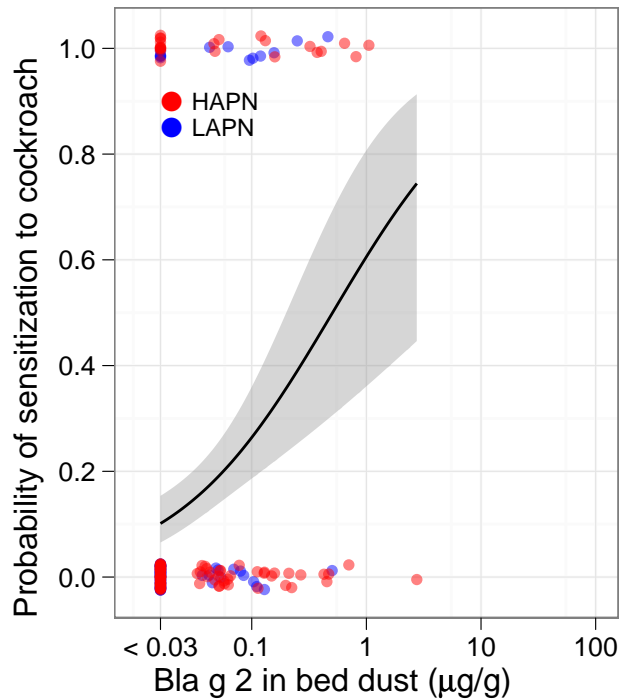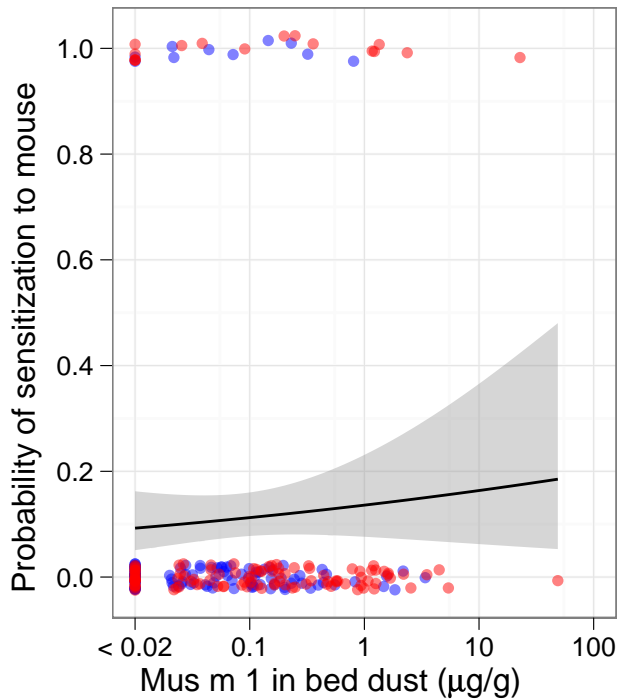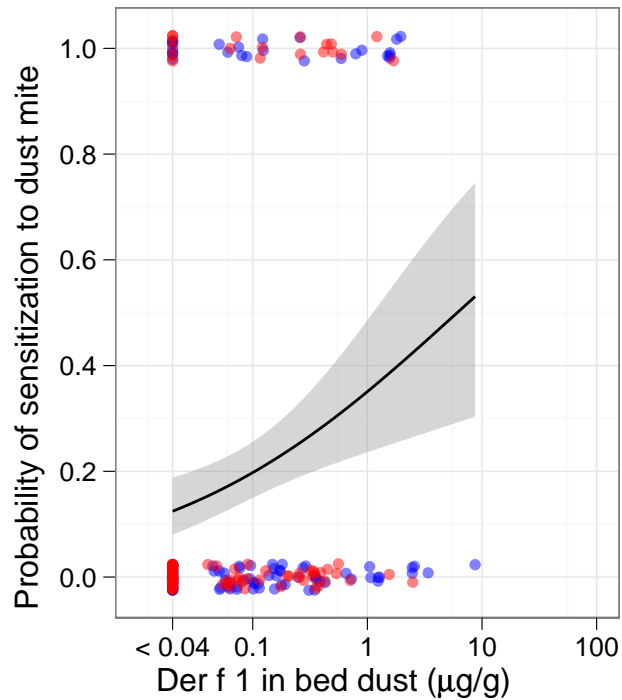

Type of file: figure

Label: Figure E1DE

Filename: figureE1\_D\_E Final.pdf

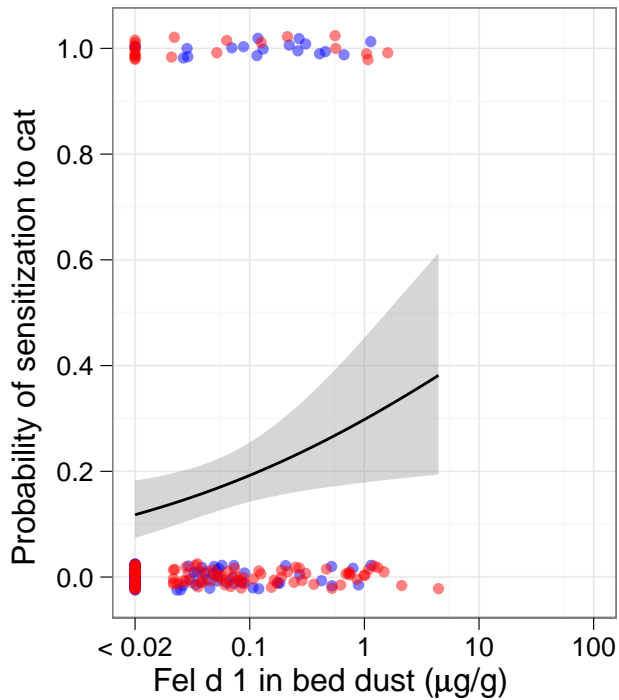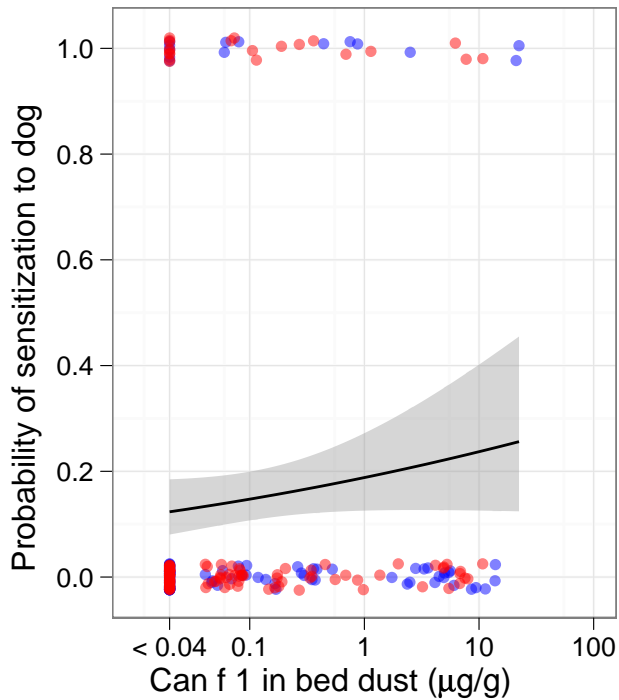

Supplement: NIHMS329523-supplement-01.pdf [file NIHMS329523-supplement-01.pdf]
